# Supplementary material for: Mutation of ATF6 causes autosomal recessive achromatopsia
Source: PubMed Central journal article supplement (PMC4529463; doi:10.1007/s00439-015-1571-4), 2015-06-11

## 0.09 Hz Rod ERG

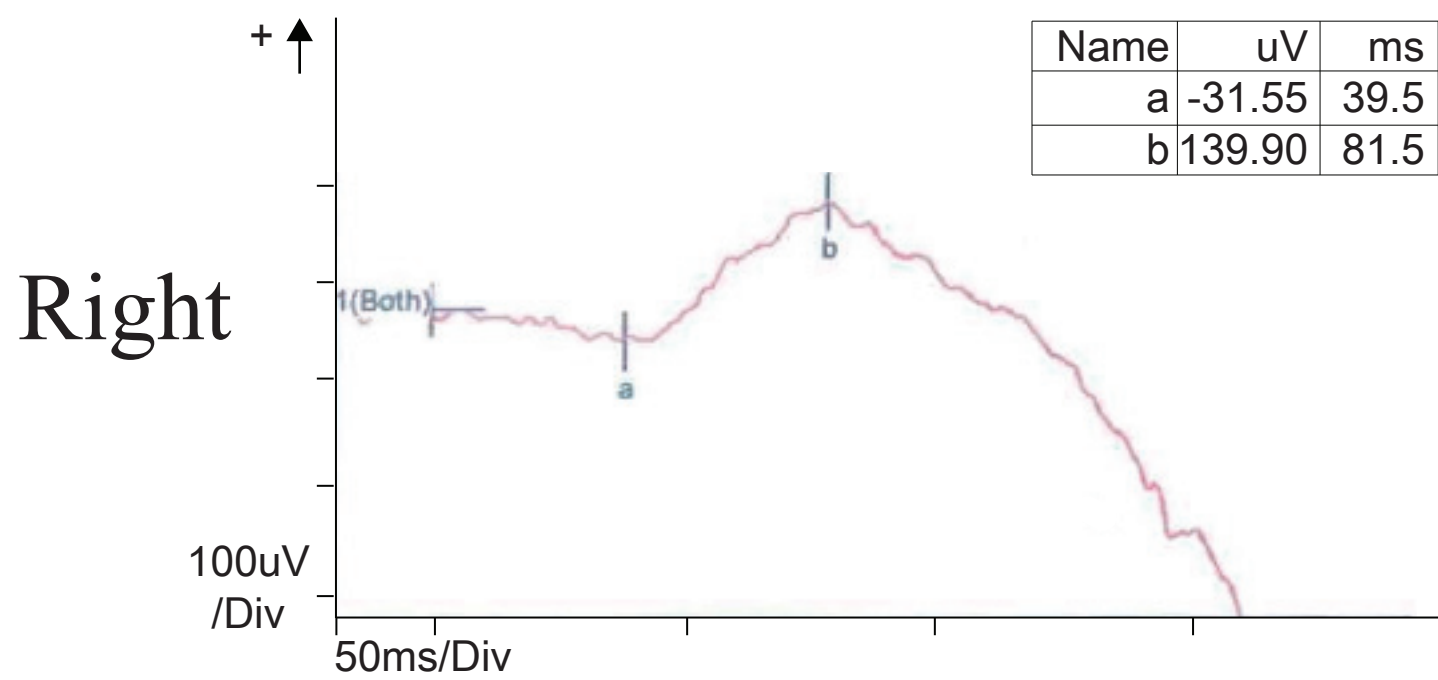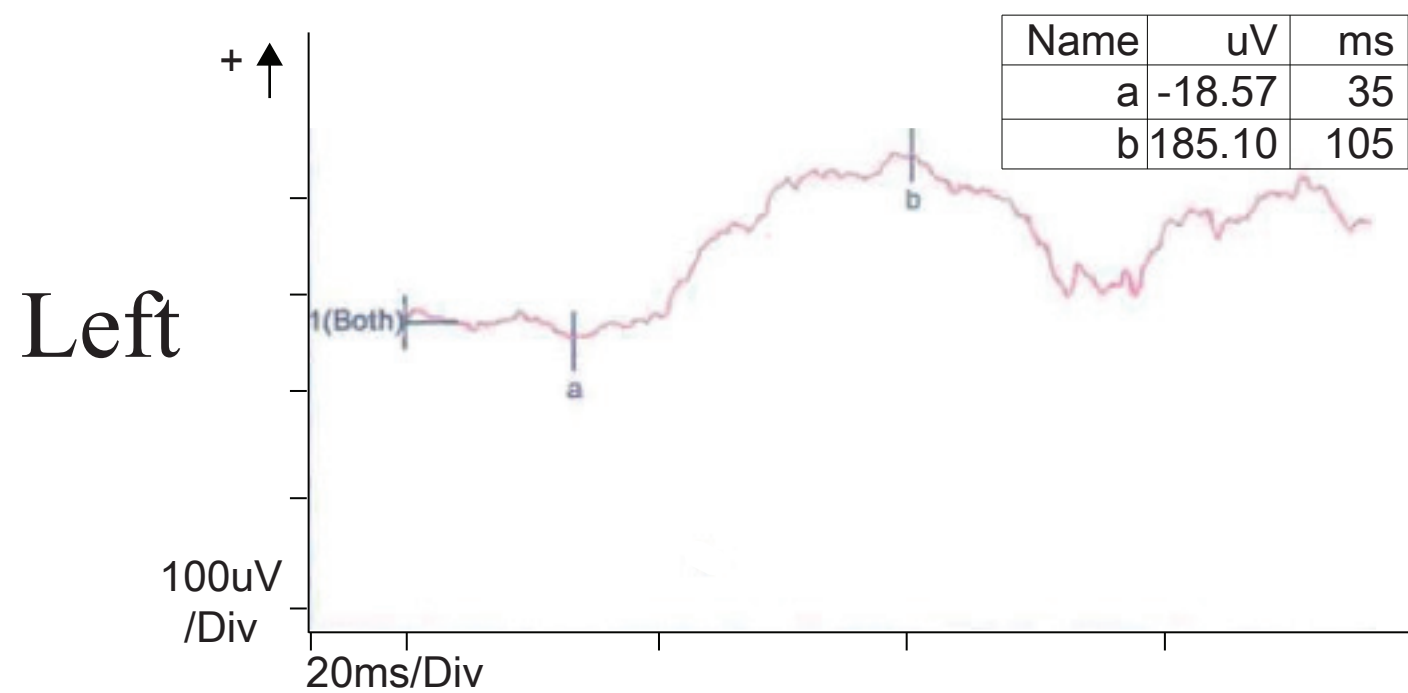

## 120 Hz Rod ERG

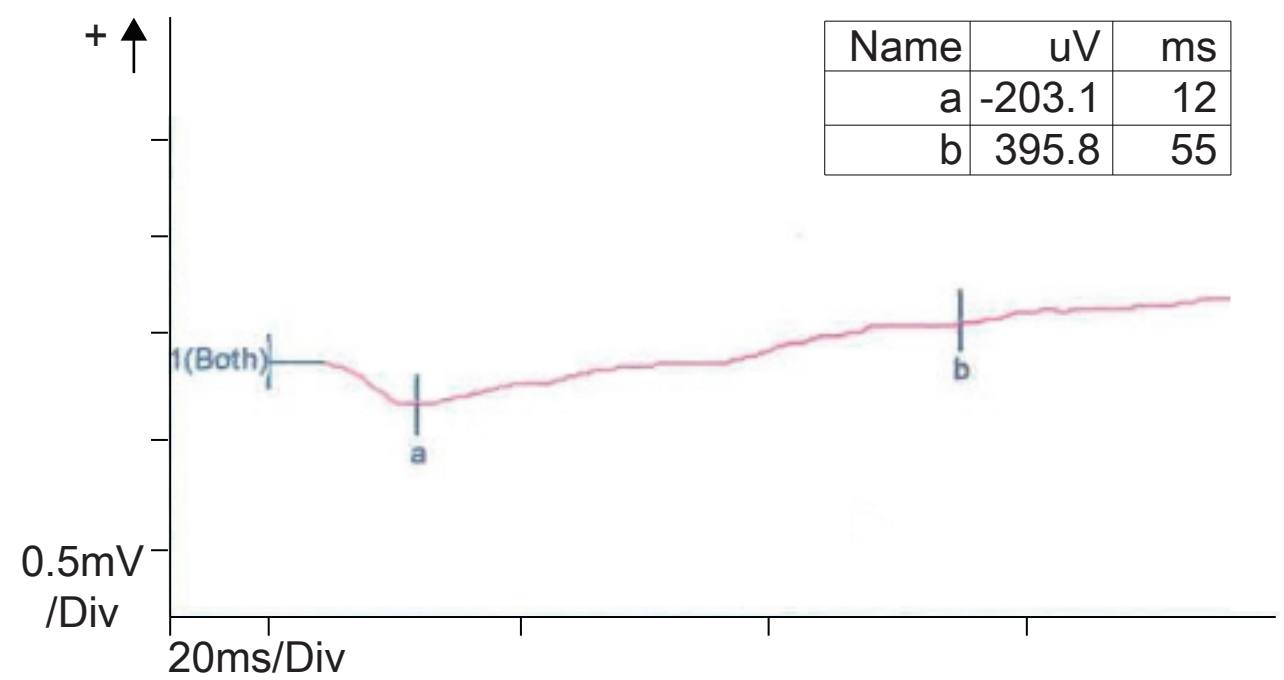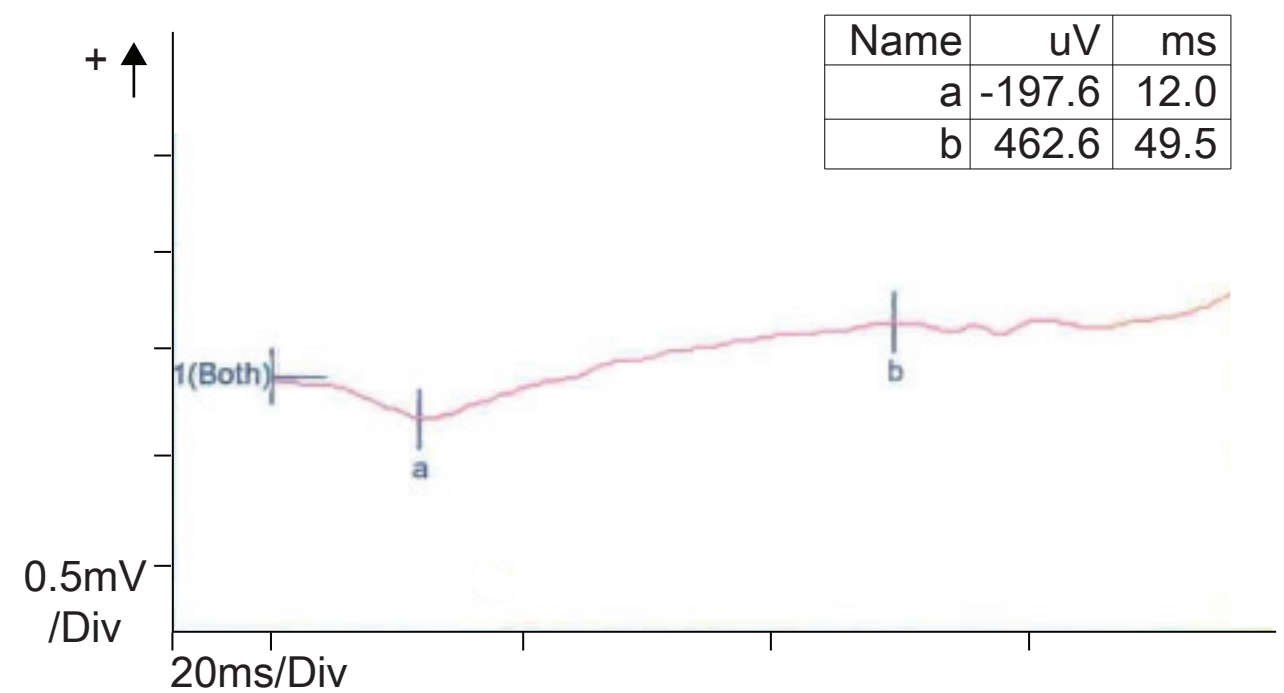

## Oscillatory Potential (Rod)

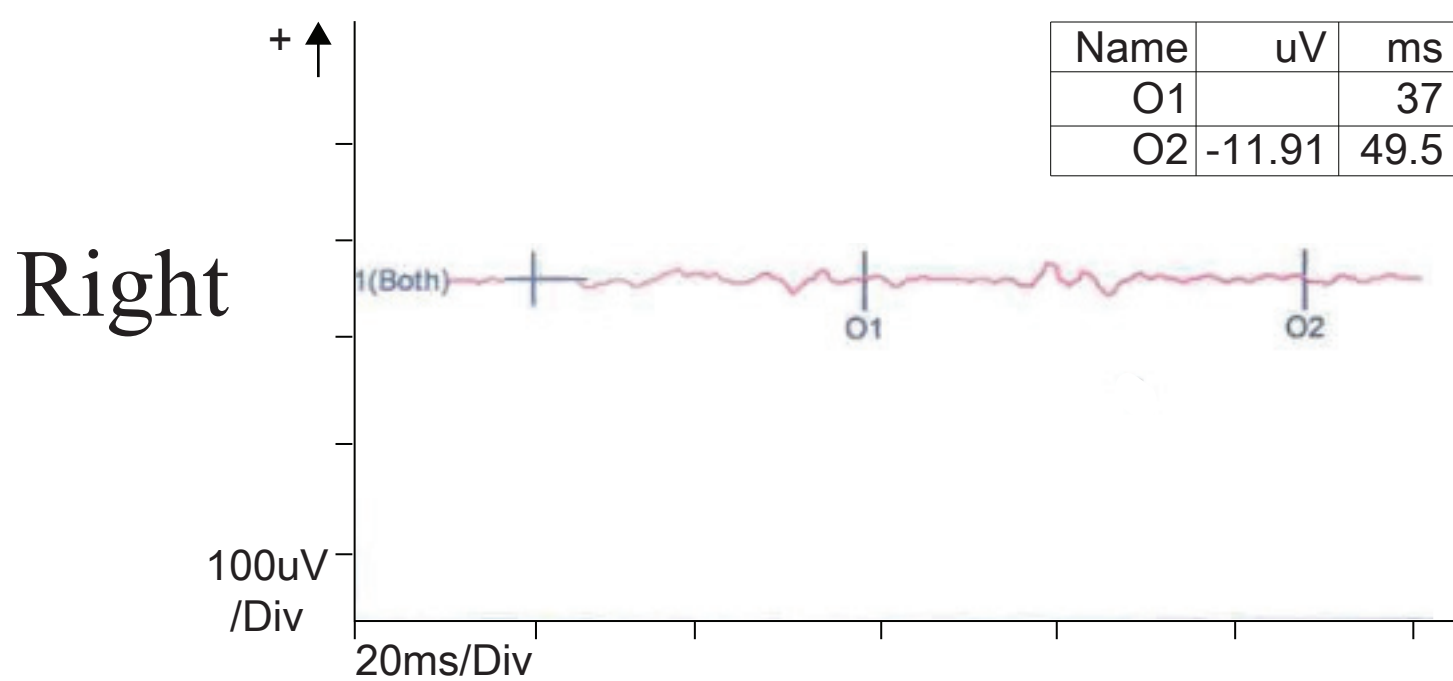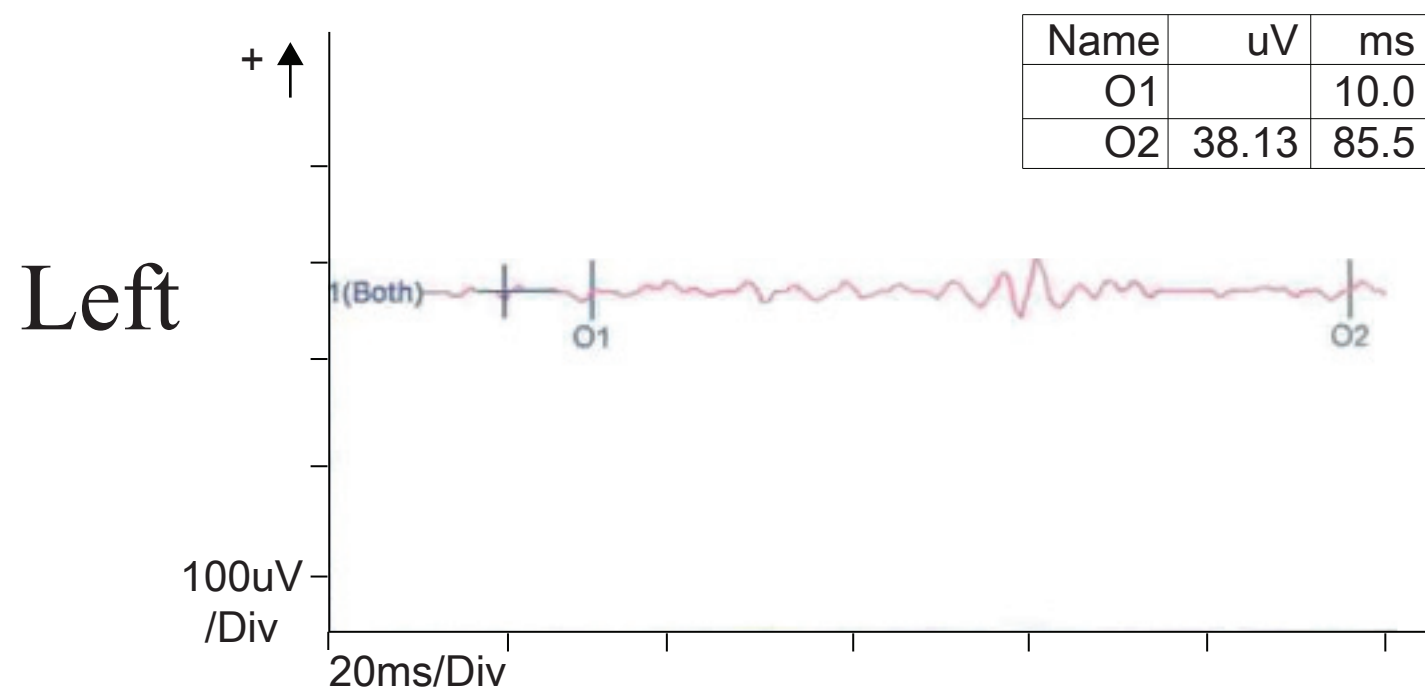

## Flicker Response

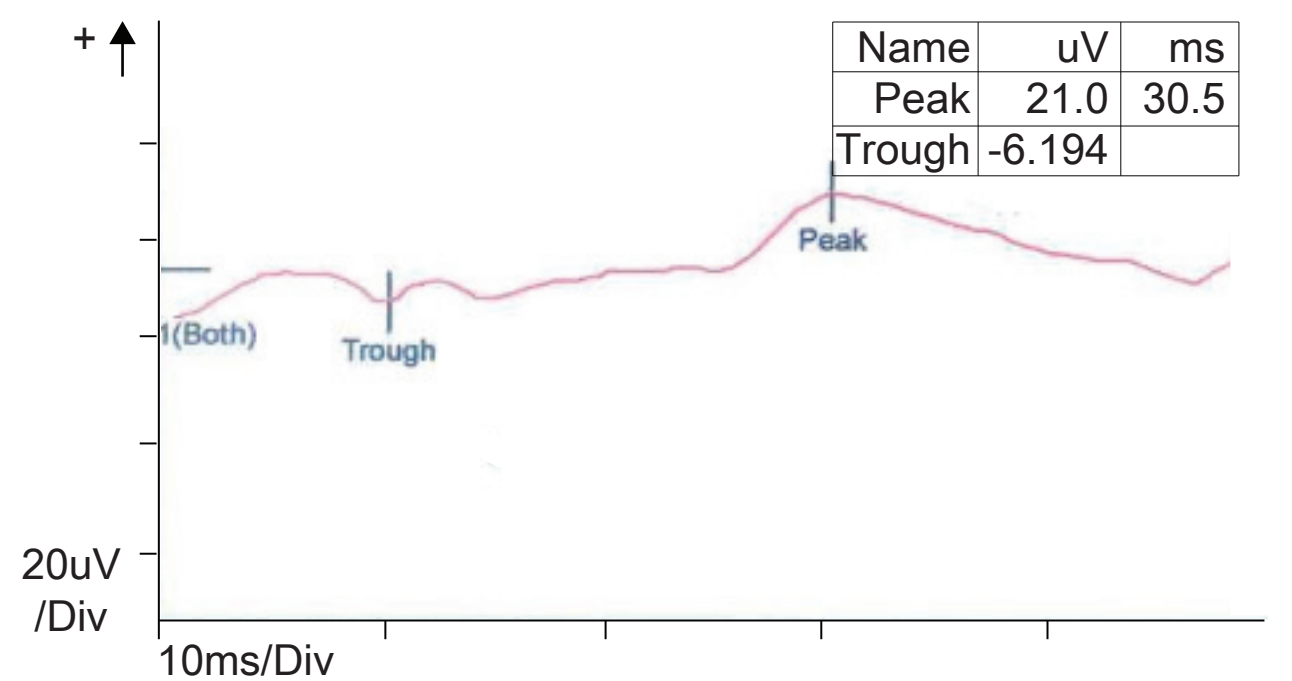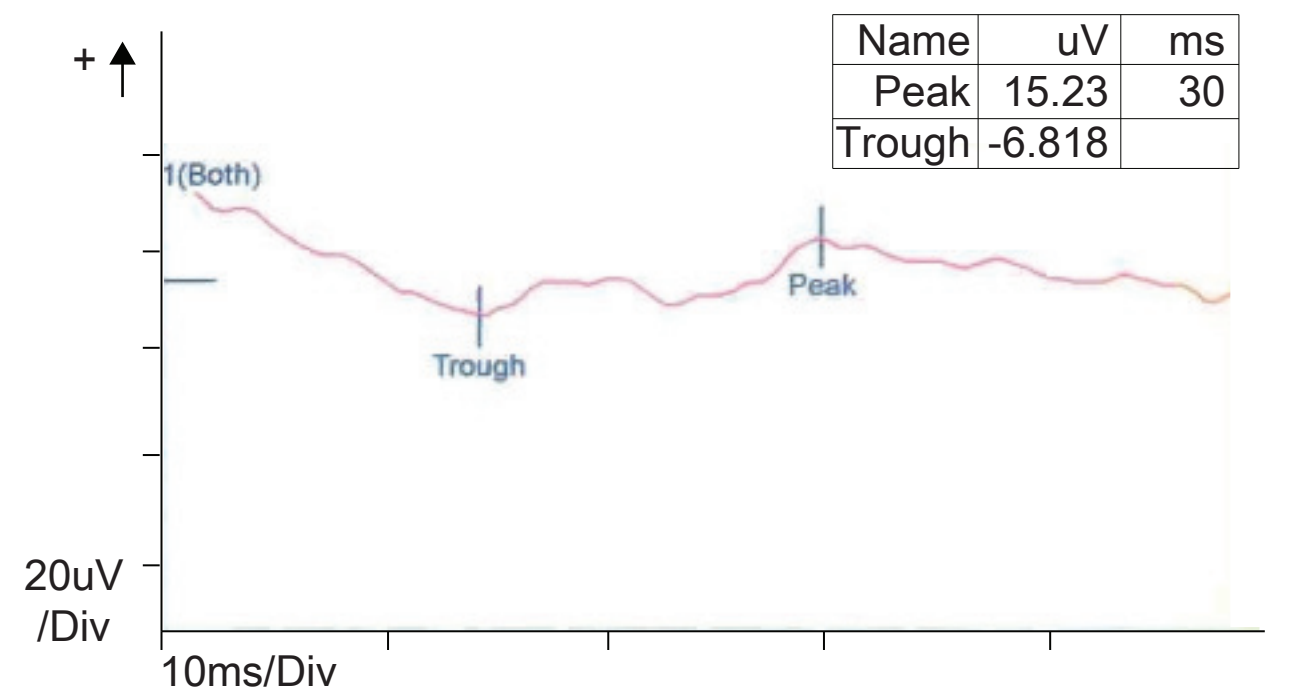

Supplement: 439_2015_1571_MOESM1_ESM.pdf [file 439_2015_1571_MOESM1_ESM.pdf]
