# Supplementary material for: Mutation of ATF6 causes autosomal recessive achromatopsia
Source: PubMed Central journal article supplement (PMC4529463; doi:10.1007/s00439-015-1571-4), 2015-06-11

(a)

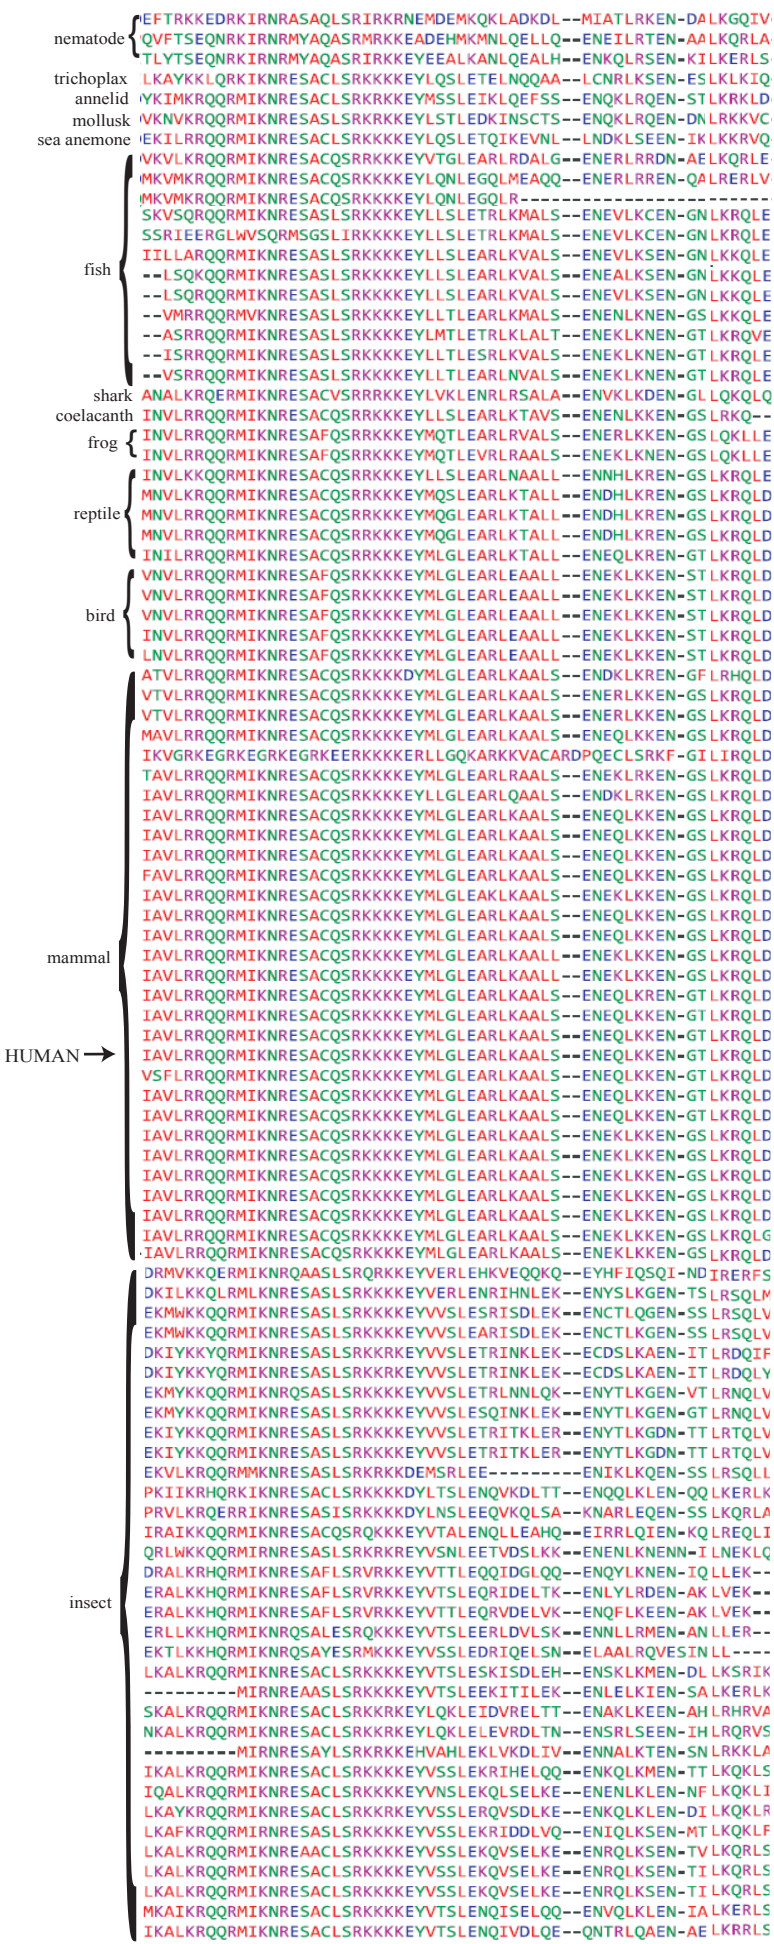

(b)

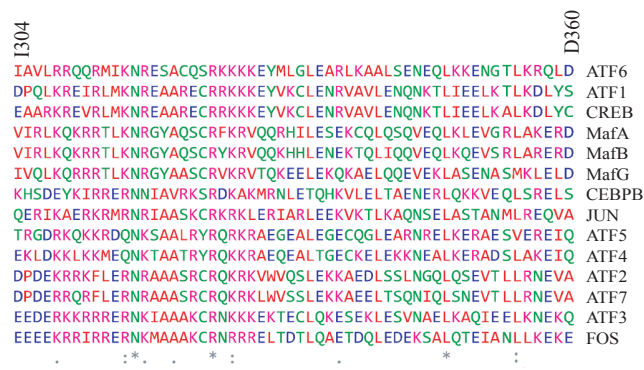

(c)

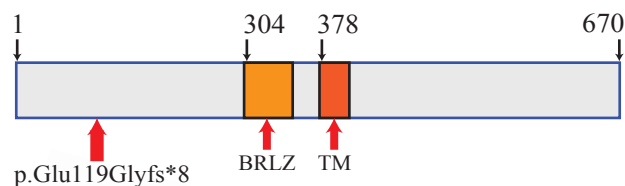

(d)

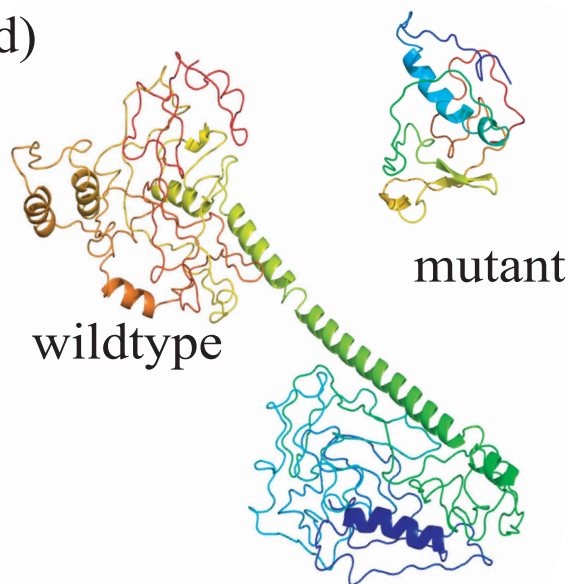

(e)

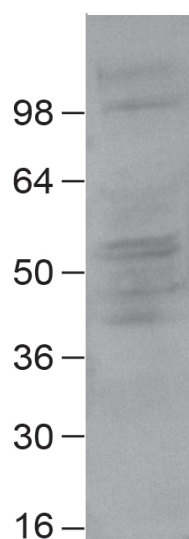

Supplement: 439_2015_1571_MOESM3_ESM.pdf [file 439_2015_1571_MOESM3_ESM.pdf]
